# Supplementary material for: Isolation and Functional Analysis of a PISTILLATA-like MADS-Box Gene from Argan Tree (Argania spinosa)
Source: MDPI journal article supplement (doi:10.3390/plants10081665), 2021-08-13
Supplement: s1 [file s1]

|    |                                                               |                                         |     |
|----|---------------------------------------------------------------|-----------------------------------------|-----|
| Mt | ATGGGAAGAGGTAAGATTGAGATCAAGAGG                                | GATTGAAAACCTCAAGCAACAGGCAAGTTACT        | 60  |
| Cb | ATGGGTAGAGGCAAGATTGAGATCAAGAGA                                | AATCGAGAACTCAAGCAACAGACAGGTTACT         | 60  |
| Ca | ATGGGGAGAGGTAAGATTGAGATCAAGAGG                                | GATTGAGAACACAAACACAGGCATGTGACT          | 60  |
| Pl | ATGGGAAGAGGTAAGATTGAGATCAAGAGG                                | GATTGAGAACTCAAATAACAGGCAGGTGACC         | 60  |
| Pd | ATGGGGAGAGGTAAGATTGAGATCAAGAGG                                | GATTGAGAACGCAAGCAACAGGCAGGTGACC         | 60  |
| Ck | ATGGGGAGAGGAAAGATAGAGATAAAGAGG                                | GATAGAGAACTCAAGCAACAGGCAGGTCACA         | 60  |
| Vv | ATGGGGAGAGGGAAGATTGAGATCAAGAGG                                | GATCGAGAACTCAAGCAACAGGCAGGTGACC         | 60  |
|    | *****                                                         | *****                                   |     |
| Mt | TATTCAAAGAGAAAGAATGGAATCCTTAAGAAAGCAAAGGAAATAAGTGTCTTTGTGAT   |                                         | 120 |
| Cb | TACTCAAAAAGAGAAATGGGATCATGAAAAAGCTAAGGAAATCAGTGTCTTTGCGAG     |                                         | 120 |
| Ca | TACTCAAAGAGAAAACTGGGATCATGAAGAAGGCTAAGGAGATCACAGTTCTTTGTGAT   |                                         | 120 |
| Pl | TACTCAAAGAGAGGACTGGGATCTTGAAGAAGGCCAGGAGATAACTGTTCTCTGCGAT    |                                         | 120 |
| Pd | TACTCTAAGAGGAAAAATGGGATTATAAAAAAGCTAAGGAGATCACAGTTTATGCGAT    |                                         | 120 |
| Ck | TACTCAAAGAGAAAGAATGGGATCATGAAGAAGGCAAGGAGATCACAGTTCTGTGTGAT   |                                         | 120 |
| Vv | TACTCAAAGAGAGAAATGGGATCATGAAGAAGGCCAAGGAGATCACTGTTCTCTGCGAT   |                                         | 120 |
|    | ***                                                           | ***                                     |     |
| Mt | GCTCAAGTTTCCCTTATCTCTTTGGTGCTTCTGGAAAGATGCATGAATACATCAGCCCT   |                                         | 180 |
| Cb | GCTCAGCTTTCTGTAGTCATCTTCGCTAGTTCTGGGAAGATGCATGAATTTTGAGCCCA   |                                         | 180 |
| Ca | GCTAAGGTTTCCCTCATCATCTTCGGTACTTCTGGAAAGATGCATGAATATATAAGTCTT  |                                         | 180 |
| Pl | GCTCATGTTTCTCTTGTATCTTTGCTACTTCAGGGAAAATGCACGAATACTGTAGCCCT   |                                         | 180 |
| Pd | GCTCAAGTTTCTCTTGTATCTTTGCTAGTTCTGGAAGGATGCATGAGTACTGCAGCCCT   |                                         | 180 |
| Ck | GCTCATGCTCTCTTGTATCTTTGCTAGTTCTGGCAAGATGCATGAGTACTGCAGCCCT    |                                         | 180 |
| Vv | GCTCATGCTCTCTTGTATCTTTGCTAGCTCTGGAAAGATGCACGAGTACTGTAGCCCT    |                                         | 180 |
|    | ***                                                           | ***                                     |     |
| Mt | TCTACCACGTTGATTGATATTCTGGACAGATACCAGAGGCCTCTGGGAAAACCTATGG    |                                         | 240 |
| Cb | AATACTACGTTAGTTGATATGTTGGATCAGTACCACAAGTTGTCTGGGAAGAGGCTCTGG  |                                         | 240 |
| Ca | TCAACAAATTTGGTTGAAATGTTGGATGCTTACCAGAGGCTCTACTGGAAAGAAGCTGTGG |                                         | 240 |
| Pl | TCCACTACGGTGATTGATATTTTGGATAGATATCACAAAGCAGTCTACAAAGAAGCTGTGG |                                         | 240 |
| Pd | TCCACTACGGTGGTCGATCTGTTGGACAAGTTCACAAAGCAGTCTGGTAAGAGGCTATGG  |                                         | 240 |
| Ck | TCAACTAAGTTGGTTGATATCTTGGATCGATATCACACACAGTCTGGGAAGAGGTTGTGG  |                                         | 240 |
| Vv | TCTACACGTTGATTGATATCTTGGATAGGTATCACAAAGCAGTCTGGGAAGAGGCTCTGG  |                                         | 240 |
|    | ***                                                           | ***                                     |     |
| Mt | GATGCTAAGCATGAGAACCCTTAGCAATGAAATTGATAGAATCAAAAAGGAGAATGATAGC |                                         | 300 |
| Cb | GATGCAAAGCATGAGCATTTTGACAATGAAATCAACAGAATCAAGAAAGAGAATGACAGC  |                                         | 300 |
| Ca | GATGCTAAGCATGAGAATTTAAGCAATGAAATTGATAGAGTTAAGAAAGAGAACGACAGC  |                                         | 300 |
| Pl | GATCCTAAGCATGAAAATCTCAGCAATGAAGTGGATCGAGTCAAAAAAGAAAACGATAAC  |                                         | 300 |
| Pd | GACGCTAAACATGAGAACCCTCAGCAAAGAGATTGACAGAATCAAGAAAGAGAATGACAGC |                                         | 300 |
| Ck | GATGCAAAGCATGAGAATTTGAGCAATGAAATTGATAGAATCAAGAAAGGAGAATGACAGC |                                         | 300 |
| Vv | GATGCAAAACATGAAAATCTCAGCAATGAATTGGATAGGATCAAAAAGGAGAATGATAGC  |                                         | 300 |
|    | ***                                                           | ***                                     |     |
| Mt | ATGCAAAATTGATCTCAGGCAC                                        | TTGAAGGGAGAGGATATTACCTCACTGAATTACAAAGAG | 360 |
| Cb | ATGCAGATTGAGCTCAGGCAC                                         | CTCAAGGGAGAAGATATCTCAACTTTGAAGTACAAAGAG | 360 |
| Ca | ATGCAGATTGAGCTCAGGCAC                                         | CTAAAGGGGGAAGACATCACATCTTTGAATTACAAAGAG | 360 |
| Pl | ATGCAGATCGAGCTCAGGCAC                                         | CTCAAGGGAGAGGATGTTACTTCTCTGAGTATCAAAGAG | 360 |
| Pd | ATGCAGATTGAGCTCAGGCAC                                         | CTGAAAGGGGAAGATATCTCATCATTGCACCACACAGAG | 360 |
| Ck | ATGCAGATTGAGCTCAGGCAC                                         | CTGAAGGGGGAAGATATCACATCTTTGCACTACAAAGAG | 360 |
| Vv | ATGCAGATTGAAGCTCAGGCAC                                        | CTGAAGGGGGAGATATCTCATCTCTGCACCACAAAGAA  | 360 |
|    | *****                                                         | *****                                   |     |

**Supplementary Figure S1.** Alignment of partial cDNA sequences (360 nucleotides) of *PISTILLATA* genes from selected woody species and from the mode legume *Medicago truncatula*. The regions highlighted with red rectangles presented four mismatches among the sequences and these regions were selected for the design of degenerated oligos. Mt, *Medicago truncatula*; Cb, *Catalpa bungei*; Ca, *Coffea arabica*; Pl, *Paeonia lactiflora*; Pd, *Populus deltoides*; Ck, *Cornus kousa*; Vv, *Vitis vinifera*.

**a**

```
ATGGGTAGAGGCAAGATAGAGATCAAGAGAATAGAGAACTCGAGCAATAGGCAAGTGACA
M G R G K I E I K R I E N S S N R Q V T
TACTCCAAGAGGAGGAATGGGATCATGAAGAAGGCTAAGGAGATCACTGTACTTTGTGAT
Y S K R R N G I M K K A K E I T V L C D
GTCAGGTCTCTCTTGTATCTTTGGGAGTTCAGGCAAGATGCATGAGTACTGTAGCCCT
A Q V S L V I F G S S G K M H E Y C S P
TCCACTACGTTGACTGACATCTTGGATAAGTATCACAAGAAGTCTGGGAAGAGGTTGTGG
S T T L T D I L D K Y H K K S G K R L W
GATGCTAAACATGAGAACCTCAGCAACGAACTTGATAGAATCAAGAAAGAGAATGATCAT
D A K H E N L S N E L D R I K K E N D H
ATGCAGATTGAGCTGAGGCACTTGAAAGGAGAAGAAATAACATCTTTGAACCACAAAGAG
M Q I E L R H L K G E E I T S L N H K E
CTCATGACCATAGAGGAAGCCCTGGAAAAATGGTCTTGCTTGTGTTGCCACAAGCAGATG
L M T I E E A L E N G L A C V R H K Q M
GAATTCCTCAGCATGATGCAGAAAAATGATAAGATGCTGGAGGACGAGAACAAAGCAGCTC
E F T M M Q K N D K M L E D E N K Q L
AATTTTCAGTTGCATCAGCAAGAGATCATTATGGGGAGTAGGGAGATGGAGAATGGATAT
N F E L H Q Q E I I M G S R E M E N G Y
CATCAGCGAGTGAGAGAGTATCCGCCCCAGATGCCCTTTGCCTTCCGCGTGCAGCCAATC
H Q R V R E Y P P Q M P F A F R V Q P I
CAGCCCAATCTGCAGGAGAGAATTTAG
Q P N L Q E R I -
```

**b**

```
Seq569 CAGGAGAGAATTTAGAATAATAACATATAATTTTCTGGTATTAATTTGAACTCTAAACTA
Seq568 CAGGAGAGAATTTAGAATAATAACATATAATTTTCTGGTATTAATTTGAACTCTAAACTA
Seq570 CAGGAGAGAATTTAGAATAATAACATATAATTTTCTGGTATTAATTTGAACTCTAAACTA
Seq571 CAGGAGAGAATTTAGAATAATAACATATAATTTTCTGGTATTAATTTGAACTCTAAACTA
*****

Seq569 AACTCAGACTCGGATTGTTTAATGTTAAGCCTTTTAGCTGTGATTGTTTGTCAAAAAAAAA
Seq568 AACTCAGACTCGGATTGTTTAATGTTAAGCCTTTTAGCTGTGATTGTTTGTCATGGGGAC
Seq570 AACTCAGACTCGGATTGTTTAATGTTAAGCCTTTTAGCTGTGATTGTTTGTCATGGGGAC
Seq571 AACTCAGACTCGGATTGTTTAATGTTAAGCCTTTTAGCTGTGATTGTTTGTCATGGGGAC
*****

Seq569 AAAAAAAAAAAA
Seq568 GTCTTAGTTAAGCTTCTTCTAATAAGGTAAACTTGCTTTGTGAAACATTTATCGTGTGAT
Seq570 GTCTTAGTTAAGCTTCTTCTAATAAGGTAAACTTGCTTTGTGAAAAAAAAAAAAAAAA
Seq571 GTCTTAGTTAAGCTTCTTCTAATAAGGTAAACTTGCTTTGTGAAAAAAAAAAAAAAAA

Seq569
Seq568 TAATGCTTGTCTGGAAAAAAAAAAAAAAAAAAAAAAAAAAAAAAAA
Seq570
Seq571 AAAA
```

**Supplementary Figure S2. *PISTILLATA* gene sequence.** (a) Coding sequence and protein from *PISTILLATA* gene from *Argania spinosa*. Conserved amino acid domains are highlighted in red (MADS domain), green (K-domain) and purple (PI-motif). Potential NLS sequences are underlined; (b) Sequences obtained by 3'RACE of the 3' untranslated region of the gene showing different lengths and polyadenylation position. The stop codon is marked in red.

|             |                                                                    |            |
|-------------|--------------------------------------------------------------------|------------|
| AtPI        | MGRGKIEIKRIENANNRVVTFSKRRNGLVKKAKEITVLCDAKVALIIFASNGKMIDYCCP       | 60         |
| PhGLO2      | MGRGKIEIKRIENSSNRQVTYSKRRNGIKKAKEITVLCDAKVSLIIFGNSGKMHEYCS         | 60         |
| MtNGL9      | MGRGKIEIKRIENSSNRQVTYSKRRSGILKKAKEINVLCDAQVSTIIIPSGKMHEYISP        | 60         |
| <b>AsPI</b> | <b>MGRGKIEIKRIENSSNRQVTYSKRRNGIMKKAKEITVLCDAQVSLVIFGSSGKMHEYCS</b> | <b>60</b>  |
| MtPI        | MGRGKIEIKRIENSSNRQVTYSKRRNGILKKAKEISVLCDAQVSLILFGASGKMHEYISP       | 60         |
| PhGLO1      | MGRGKIEIKRIENSSNRQVTYSKRRNGILKKAKEISVLCDARVSVIIFASSGKMHEFSS-       | 59         |
| AmGLO       | MGRGKIEIKRIENSSNRQVTYSKRRNGIMKKAKEISVLCDAHVSIIIFASSGKMHEFCSP       | 60         |
|             | *****:.* **:*:*:*:*:*:*:*:*:*:*:*:*:*:*:*:*:*:*:*:*:*:*:*:*:*:*    |            |
| AtPI        | SMDLGAMLDQYQKLSGKKLWDAKHENLSNEIDRIKKENDSLQLELRHLKGEDIQSLNLKN       | 120        |
| PhGLO2      | STTLPDMLDGYQKTSGRRLWDAKHENLSNEIDRIKKENDNMQVKLRHLKGEDINSLNHKE       | 120        |
| MtNGL9      | STTLIDMLERYHKASGKRLWDAKHENLKNEIEKLKKENEDMQIQLRHLKGKDINTLNYKK       | 120        |
| <b>AsPI</b> | <b>STTLTDILDYHKSGKRLWDAKHENLSNELDRICKENDHMQIELRHLKGEEITSLNHKE</b>  | <b>120</b> |
| MtPI        | STTLIDILDYQASGKTLWDAKHENLSNEIDRIKKENDSMQIDLRHLKGEDITSLNYKE         | 120        |
| PhGLO1      | -TSLVDILDQYHKLGTGRRLWDAKHENLDNEINKVKDNDNMQIELRHLKGEDITSLNHRE       | 118        |
| AmGLO       | STTLVDMLDHYHKLSGKRLWDPKHEHLNEINRVKKENDSMQIELRHLKGEDITTLNYKE        | 120        |
|             | * :*: *: *: * * *:*:*:*:*:*:*:*:*:*:*:*:*:*:*:*:*:*:*:*            |            |
| AtPI        | LMAVEHAIEHGLDKVRDHQMEILISKRRNEKMMAEQRLTFQLQQQEMAIASNARGMM          | 180        |
| PhGLO2      | LMVLEEGTLNGLSSISAKQSEILRMVRKNDQILEEEHKQLQYALHQKEMAAMGGNMRMIE       | 180        |
| MtNGL9      | LMSLEDVLENGLLTVRHQKQMEVYKMKVRNDKILKEENRELNFIQQQQGYGSGRW---EI       | 177        |
| <b>AsPI</b> | <b>LMTIEEALENGLACVRHKQMEFFTMQKNDKMLEDENKQLNFELHQEIIIMGSRE---ME</b> | <b>177</b> |
| MtPI        | LMALEESLENGLTGVDRKKMEVHRMFKRNGKILEDENKELNFIQQHMALEGVGN---MH        | 177        |
| PhGLO1      | LMILEDALENGLTSIRNKQNEVLRMMRKKTSMEEEQDQLNCQLRQLEIATMNRNMGEIG        | 178        |
| AmGLO       | LMVLEDALENGTSALKNKQMEFVRMMRKHNEVEEENQSLQFKLRQMHLDPMNDNVMESQ        | 180        |
|             | ** :*. : :* : : * . : : : : :*:.* *:*                              |            |
| AtPI        | R-----DHDGQFGYRVQPIQPNLQEKIMSLVID                                  | 208        |
| PhGLO2      | EVYHQ----RDRDYEYQMPFALRVQPMQPNLHERM-----                           | 212        |
| MtNGL9      | NGL-----                                                           | 180        |
| <b>AsPI</b> | <b>NGYHQ----RVREYP-QMPFAFRVQPIQPNLQERI-----</b>                    | <b>208</b> |
| MtPI        | GQWI-----                                                          | 181        |
| PhGLO1      | EVFQQR---ENHDYQ-NHMPFAFRVQPMQPNLQERL-----                          | 210        |
| AmGLO       | AVYDHHHHQNIADYE-AQMPFAFRVQPMQPNLQERF-----                          | 215        |

**Supplementary Figure S3.** Protein alignment of AsPI and functional characterized PI/GLO-related proteins from different species. Amino acid residues identical to all the sequences are indicated by stars (\*). To improve the alignment, dashes were introduced into the sequence. The region designated as the PI motif is boxed. At, *Arabidopsis thaliana*; Ph, *Petunia hybrida*; Mt, *Medicago truncatula*; As, *Argania spinosa*; Am, *Antirrhinum majus*.

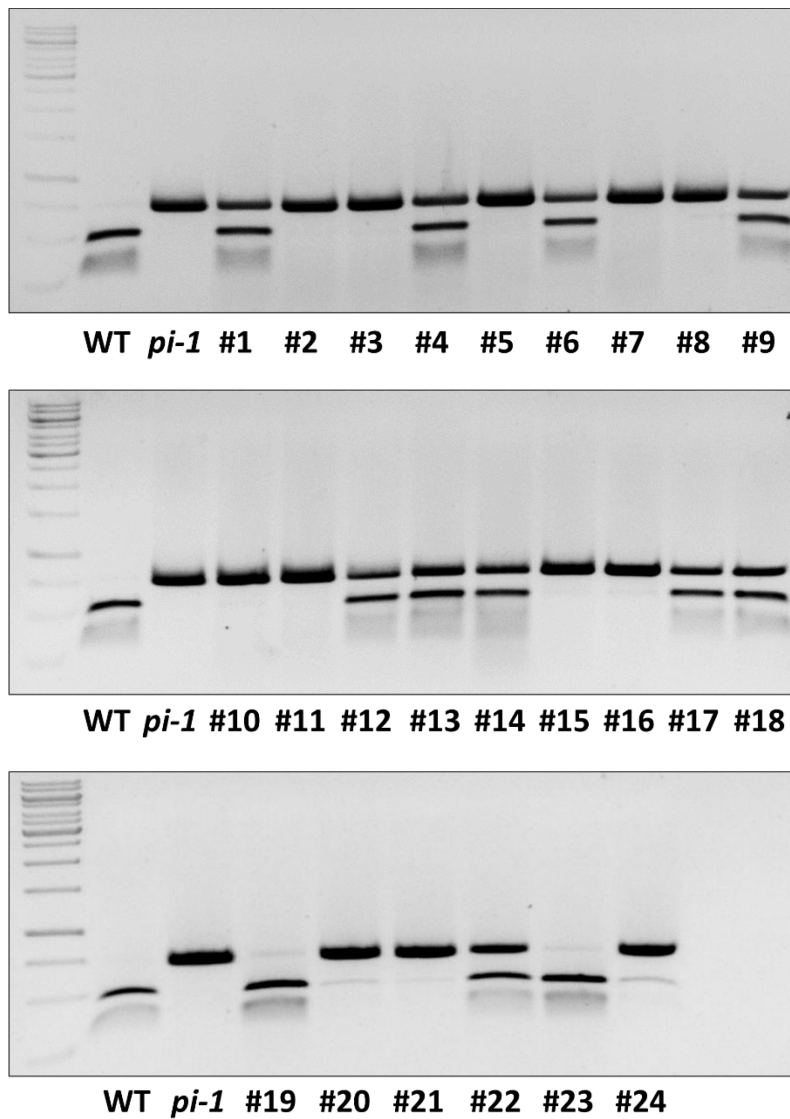

**Supplementary Figure S4:** Genotyping of transgenic plants transformed with 35S::*AsPI* for the presence of the *pi-1* mutation. A genomic PCR product (729 bp) was amplified and digested by *Bse*GI. Two fragments (451 and 278 bp) were obtained in the case of wild-type plants (lower bands are generally faint in the gels). *Bse*GI does not cut the 729 bp PCR fragment in *pi-1/pi-1* homozygous plants. Heterozygous *PI/pi-1* plants showed three bands. Twenty-four transformants were analysed.

**Supplementary Table S1.** Primers used in this work.

| Primer name        | Primer sequences (5' to 3')         |                            |
|--------------------|-------------------------------------|----------------------------|
| PI DEG FOR         | ATG GGD AGA GGH AAG ATW GAG ATM AAG | Degenerated oligo          |
| PI DEG REV         | GTG CCT SAG HTC RAT YTG CAT         | Degenerated oligo          |
| AsPI GSP2          | GAG AAC CTC AGC AAC GAA CT          | 3' RACE                    |
| AsPI GSP7          | CCT CTT CCC AGA CTT CTT GTG AT      | 5' RACE                    |
| PI argan ATG For   | ATG GGT AGA GGC AAG ATA GAG         | AsPI cDNA<br>amplification |
| PI argan -STOP Rev | AAT TCT CTC CTG CAG ATT GGG C       |                            |
| Q-AsPI For3        | GGG ATC ATG AAG AAG CTA AGG         | qRT-PCR                    |
| Q-AsPI Rev3        | GGC TAC AGT ACT CAT GCA TCT T       |                            |
| Arg YCF2 For       | CCC GAA CCA AGG AAT CCC T           | qRT-PCR                    |
| Arg YCF2 Rev       | TCC CCT TCT TCA AAC TCC GAT         |                            |
| AtTIP41 For        | GTG AAA ACT GTT GGA GAG AAG CAA     | qRT-PCR                    |
| AtTIP41 Rev        | TCA ACT GGA TAC CCT TTC GCA         |                            |

**Supplementary Table S2.** Accession numbers of the *AP3/DEF*- and *PI/GLO*-related MADS-box genes used for phylogenetic analysis.

| <b>Gene</b>        | <b>Species</b>                   | <b>GenBank Id</b> |
|--------------------|----------------------------------|-------------------|
| <i>MtPI</i>        | <i>Medicago truncatula (Mt)</i>  | FJ403468          |
| <i>PIPI</i>        | <i>Paeonia lactiflora (Pl)</i>   | KC354379          |
| <i>CabuPI</i>      | <i>Catalpa bulgaei (Cabu)</i>    | KM112022.1        |
| <i>CaPI</i>        | <i>Coffea arabica (Ca)</i>       | KJ483234          |
| <i>CorPI</i>       | <i>Cornus kousa (Cor)</i>        | JQ753781          |
| <i>PdPI</i>        | <i>Populus deltoides (Pd)</i>    | EU029172          |
| <i>VvPI</i>        | <i>Vitis vinifera (Vv)</i>       | NM_001280946.1    |
| <i>MASAKO BP</i>   | <i>Rosa rugosa</i>               | AB038462.1        |
| <i>SITM6/FBP1</i>  | <i>Solanum lycopersicum (Sl)</i> | XM_004245154.4    |
| <i>PhGLO1</i>      | <i>Petunia Hybrida (Ph)</i>      | M91190.1          |
| <i>PhGLO2</i>      | <i>Petunia Hybrida (Ph)</i>      | X69947.1          |
| <i>AmGLO</i>       | <i>Antirrhinum majus (Am)</i>    | AB516403          |
| <i>MtPI</i>        | <i>Medicago truncatula (Mt)</i>  | FJ403468          |
| <i>MtNGL9</i>      | <i>Medicago truncatula (Mt)</i>  | FJ403469          |
| <i>Paps PI-1</i>   | <i>Papaver somniferum (Ps)</i>   | EF071994.1        |
| <i>Paps PI-2</i>   | <i>Papaver somniferum (Ps)</i>   | EF071995.1        |
| <i>AtPI</i>        | <i>Arabidopsis thaliana (At)</i> | NM_122031         |
| <i>MtTM6</i>       | <i>Medicago truncatula (Mt)</i>  | JN412097.1        |
| <i>MtNMH7</i>      | <i>Medicago truncatula (Mt)</i>  | JN412096.1        |
| <i>AtAP3</i>       | <i>Arabidopsis thaliana (At)</i> | AY142590          |
| <i>PhTM6</i>       | <i>Petunia Hybrida (Ph)</i>      | AF230704          |
| <i>PhDEF</i>       | <i>Petunia Hybrida (Ph)</i>      | DQ539416.1        |
| <i>SITAP3/TDR6</i> | <i>Solanum lycopersicum (Sl)</i> | AY098734.2        |
| <i>AmDEF</i>       | <i>Antirrhinum majus (Am)</i>    | HQ853386.1        |
| <i>MdMADS13</i>    | <i>Malus domestica (Md)</i>      | NM_001328749.1    |
| <i>MdTM6</i>       | <i>Malus domestica (Md)</i>      | AB081093.1        |
